# Supplementary material for: The regulatory function of the AAA4 ATPase domain of cytoplasmic dynein
Source: PubMed Central journal article supplement (PMC7683685; doi:10.1038/s41467-020-19477-3), 2020-11-23
Supplement: 41467_2020_19477_MOESM1_ESM.pdf [file 41467_2020_19477_MOESM1_ESM.pdf]

**“The regulatory function of the AAA4 ATPase domain of cytoplasmic dynein”**

**Liu et al.**

**Supplementary Information**

## Supplementary Tables

| <b>Construct</b> | <b>Description</b>                                                    | <b>Genotype</b>                                                                           | <b>Source</b> |
|------------------|-----------------------------------------------------------------------|-------------------------------------------------------------------------------------------|---------------|
| VY137            | WT Dyn1 <sub>331kDa</sub>                                             | <i>pGAL-ZZ-TEV-GFP-3xHA-331DYN1</i>                                                       | Vale lab      |
| VY696            | AAA3 E/Q - Dyn1 <sub>331kDa</sub>                                     | <i>pGAL-ZZ-TEV-GFP-3xHA-331DYN1 (E2488Q)</i>                                              | Vale lab      |
| VY697            | AAA4 E/Q - Dyn1 <sub>331kDa</sub>                                     | <i>pGAL-ZZ-TEV-GFP-3xHA-331DYN1 (E2819Q)</i>                                              | Vale lab      |
| VY861            | AAA3 K/A - Dyn1 <sub>331kDa</sub>                                     | <i>pGAL-ZZ-TEV-GFP-3xHA-331DYN1 (K2424A)</i>                                              | Vale lab      |
| VY862            | AAA4 K/A - Dyn1 <sub>331kDa</sub>                                     | <i>pGAL-ZZ-TEV-GFP-3xHA-331DYN1 (K2766A)</i>                                              | Vale lab      |
| GY302            | AAA1 E/Q, AAA3 E/Q, AAA4 E/Q - Dyn1 <sub>331kDa</sub>                 | <i>pGAL-ZZ-TEV-GFP-3xHA-331DYN1 (E1849Q, E2488Q, E2819Q)</i>                              | This study    |
| GY304            | AAA1 E/Q, AAA3 E/Q, AAA4 K/A - Dyn1 <sub>331kDa</sub>                 | <i>pGAL-ZZ-TEV-GFP-3xHA-331DYN1 (E1849Q, E2488Q, K2766A)</i>                              | This study    |
| GY306            | AAA3 E/Q, AAA4 E/Q - Dyn1 <sub>331kDa</sub><br>+ C-term GFP           | <i>pGAL-ZZ-TEV-3xHA-331DYN1 (E2488Q, E2819Q)-GFP</i>                                      | This study    |
| GY308            | AAA4 E/Q - Dyn1 <sub>331kDa</sub><br>+ C-term GFP                     | <i>pGAL-ZZ-TEV-3xHA-331DYN1 (E2819Q)-GFP</i>                                              | This study    |
| GY310            | AAA1 E/Q, AAA3 E/Q, AAA4 E/Q - Dyn1 <sub>331kDa</sub><br>+ C-term GFP | <i>pGAL-ZZ-TEV-3xHA-331DYN1 (E1849Q, E2488Q, E2819Q)-GFP</i>                              | This study    |
| GY312            | AAA1 E/Q, AAA4 E/Q - Dyn1 <sub>331kDa</sub>                           | <i>pGAL-ZZ-TEV-GFP-3xHA-331DYN1 (E1849Q, E2819Q)</i>                                      | This study    |
| GY314            | AAA1 E/Q, AAA4 K/A - Dyn1 <sub>331kDa</sub>                           | <i>pGAL-ZZ-TEV-GFP-3xHA-331DYN1 (E1849Q, K2766A)</i>                                      | This study    |
| GY318            | AAA1 E/Q, AAA3 K/A, AAA4 E/Q - Dyn1 <sub>331kDa</sub>                 | <i>pGAL-ZZ-TEV-GFP-3xHA-331DYN1 (E1849Q, K2424A, E2819Q)</i>                              | This study    |
| GY322            | AAA4 K/A - Dyn1 <sub>331kDa</sub><br>+ C-term GFP                     | <i>pGAL-ZZ-TEV-3xHA-331DYN1 (K2766A)-GFP</i>                                              | This study    |
| GY326            | AAA1 E/Q, AAA3 K/A, AAA4 K/A - Dyn1 <sub>331kDa</sub>                 | <i>pGAL-ZZ-TEV-GFP-3xHA-331DYN1 (E1849Q, K2424A, K2766A)</i>                              | This study    |
| GY328            | AAA3 E/Q, AAA4 E/Q - Dyn1 <sub>331kDa</sub>                           | <i>pGAL-ZZ-TEV-GFP-3xHA-331DYN1 (E2488Q, E2819Q)</i>                                      | This study    |
| GY330            | AAA4 K/A – Full-length dynein                                         | <i>ZZ-TEV-GFP-GS-HALOTAG-GS-3xHA-DYN1<br/>PAC11-13xMYC::TRP<br/>nip100Δ::NAT (K2766A)</i> | This study    |

|       |                                                               |                                                                                                        |            |
|-------|---------------------------------------------------------------|--------------------------------------------------------------------------------------------------------|------------|
| GY332 | AAA3 K/A - Full-length dynein                                 | <i>ZZ-TEV-GFP-GS-HALOTAG-GS-3xHA-DYN1</i><br><i>PAC11-13xMYC::TRP</i><br><i>nip100Δ::NAT (K24624A)</i> | This study |
| GY336 | AAA1 E/Q, AAA4 K/A - Dyn1 <sub>331kDa</sub> + C-term GFP      | <i>pGAL-ZZ-TEV-3xHA-331DYN1 (E1849Q, K2766A)-GFP</i>                                                   | This study |
| GY338 | AAA4 K/A, AAA5 mutation - Dyn1 <sub>331kDa</sub> + C-term GFP | <i>pGAL-ZZ-TEV-3xHA-331DYN1 (K2766A, K3438E, R3445E, F3446D)-GFP</i>                                   | This study |
| GY340 | AAA4 E/Q - Full-length dynein                                 | <i>ZZ-TEV-GFP-GS-HALOTAG-GS-3xHA-DYN1</i><br><i>PAC11-13xMYC::TRP</i><br><i>nip100Δ::NAT (E2819Q)</i>  | This study |
| GY342 | AAA1 K/A, AAA4 K/A - Dyn1 <sub>331kDa</sub>                   | <i>pGAL-ZZ-TEV-GFP-3xHA-331DYN1 (K1802A, K2766A)</i>                                                   | This study |
| GY344 | AAA3 E/Q - Full-length dynein                                 | <i>ZZ-TEV-GFP-GS-HALOTAG-GS-3xHA-DYN1</i><br><i>PAC11-13xMYC::TRP</i><br><i>nip100Δ::NAT (E2488Q)</i>  | This study |
| GY346 | AAA1 K/A, AAA4 E/Q - Dyn1 <sub>331kDa</sub>                   | <i>pGAL-ZZ-TEV-GFP-3xHA-331DYN1 (K1802A, E2819Q)</i>                                                   | This study |

**Table S1:** Yeast strains used in this work. “331DYN1” encodes amino acids 1219-4092 of Dyn1, with predicted molecular weight of 331 kDa, and single-headed dynein (see Reck-Peterson et al. Cell 2016, and remark in footnote on page 8, section “Yeast culture and dynein purification” in Nicholas et al. PNAS 2015), and WT (“wild type”) represents the tail-truncated, single-headed dynein construct without AAA mutation. All yeast strains are based on W303 (*MATa/MATα {leu2-3,112 trp1-1 can1-100 ura3-1 ade2-1 his3-11,15} [phi+]*) plus *pep4Δ::HIS3, prb1Δ*.

|                             |                                                      |
|-----------------------------|------------------------------------------------------|
| <b>URA primers</b>          |                                                      |
| u1F                         | gtgattctgggtagaagatcgg                               |
| u2R                         | gagcaatgaaccaataacgaaatc                             |
| u3F                         | cttgacggttcgctgactgatgagc                            |
| u4R                         | cgatgatgtagtttctggttttaa                             |
|                             |                                                      |
| <b>Primers for AAA1 E/Q</b> |                                                      |
| F                           | GAGTGGCTACCTCTTGCAATATAA                             |
| R                           | CCAAAGGGCTGCAATTTCTT                                 |
| Stitch-F                    | TTAAAAACCAGAACTACATCATCGCCAGGTTGGTAAGTCCCATT<br>ATT  |
| R-stitch                    | CCGATCTTCTACCCAGAATCACACCTACTAGAAGCCTGGAAAG<br>A     |
| Mutant F                    | GTTTCGATCAATTCAATAGGCTCGA                            |
| Mutant R                    | TCGAGCCTATTGAATTGATCGAAAC                            |
|                             |                                                      |
| <b>Primers for AAA3 K/A</b> |                                                      |
| F                           | TTAGAAACCGCGGTGCAG                                   |
| R                           | GATTGCAGGCACCAACAATATG                               |
| Stitch-F                    | TTAAAAACCAGAACTACATCATCGCGAAAGACACGACCACAG<br>AA     |
| R-stitch                    | CCGATCTTCTACCCAGAATCACAACCTCAACTTATCGTTCGCAAT<br>AAC |
| Mutant F                    | ACCTGGATCTGGTGCTACAATGA                              |
| Mutant R                    | TCATTGTAGCACCAGATCCAGGT                              |
|                             |                                                      |
| <b>Primers for AAA3 E/Q</b> |                                                      |
| F                           | TCCGAAATTCCTCTGTTTCTT                                |
| R                           | TGCCTTGGACCAGTGTTAAT                                 |
| Stitch-F                    | TTAAAAACCAGAACTACATCATCGCAGACATGCTGCTATTCT<br>TTAC   |
| R-stitch                    | CCGATCTTCTACCCAGAATCACTATGTTCTGTGGTCGTGTCTTT         |
| Mutant F                    | TGTGACCAAATTAATTTACCAAACTCGA                         |
| Mutant R                    | TCGAGTTTTGGTAAATTAATTTGGTCACA                        |
|                             |                                                      |
| <b>Primers for AAA4 K/A</b> |                                                      |
| F                           | GGTCCAAGGCAAACACTAAGA                                |
| R                           | TCTCCAACAAACCAGTCATACA                               |
| Stitch-F                    | TTAAAAACCAGAACTACATCATCGCCCAAGATCCACCGTCATT          |
| R-stitch                    | CCGATCTTCTACCCAGAATCACCCAGCTCCTCATCACAGAATG          |

|                                  |                                                          |
|----------------------------------|----------------------------------------------------------|
| Mutant F                         | CAGAACAGGTGCTACTATTTTAACTAG                              |
| Mutant R                         | CTAGTTAAAATAGTAGCACCTGTTCTG                              |
|                                  |                                                          |
| <b>Primers for AAA4 E/Q</b>      |                                                          |
| F                                | GTGATGAGGAGCTGGAAGTG                                     |
| R                                | TTGGCCACTTGGGACATT                                       |
| Stitch-F                         | TTAAAAACCAGAACTACATCATCGGGAGAGGAGTATGATAAG<br>CTCTTG     |
| R-stitch                         | CCGATCTTCTACCCAGAATCACCAAAGTCGCTAAGATTGGAAT<br>GAC       |
| Mutant F                         | CTTGTTTAATCATTGATCAATCCAAC                               |
| Mutant R                         | GTTGGATTGATCAATGATTAAACAAG                               |
|                                  |                                                          |
| <b>Primers for AAA5 mutation</b> |                                                          |
| F                                | AGAAAGGTGGCTGAACACTAC                                    |
| R                                | GGCCTCTTTCTTCAGGTTGT                                     |
| Stitch-F                         | TTAAAAACCAGAACTACATCATCGTCCTCAGATCTAGGGTAAG<br>GTTAG     |
| R-stitch                         | CCGATCTTCTACCCAGAATCACGTTATCATGTGGGAGCTTGGA              |
| Mutant F                         | GAAGAAGGTTTTGTTGAAAGATTAGAAAATGCAGTTGAAGATG<br>GAAGTGTAG |
| Mutant R                         | CTACACTTCCATCTTCAACTGCATTTTCTAATCTTTCAACAAAAC<br>CTTCTTC |

**Table S2:** List of primers used for the generation of yeast strains. For methods of primers design and yeast transfection see Rao et al. in Methods Mol. Biol. 2018.
